# Supplementary material for: Effects of Soil Nutrients on Plant Nutrient Traits in Natural Pinus tabuliformis Forests
Source: MDPI journal article supplement (doi:10.3390/plants12040735), 2023-02-07
Supplement: s1 [file s1]

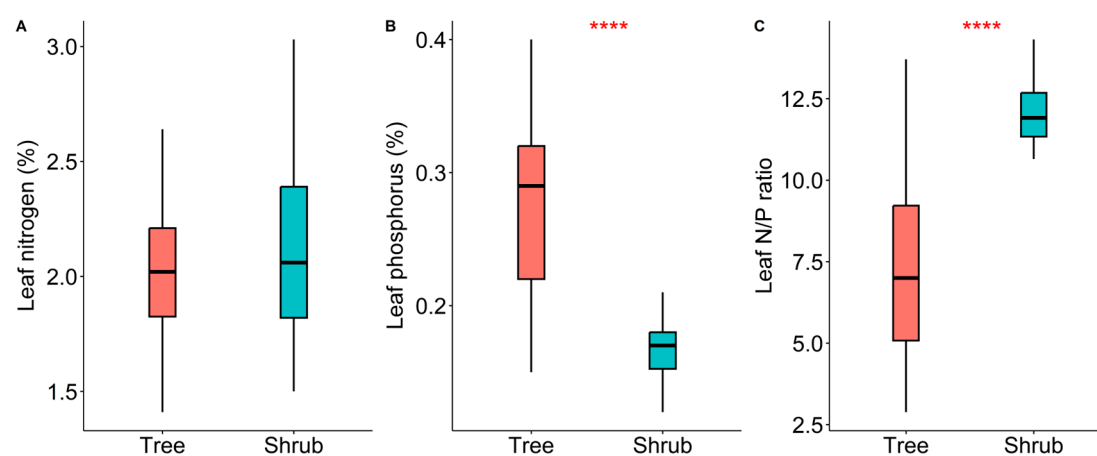

**Figure S1.** A comparison of the differences in the  $N_{\text{mass}}$  (A),  $P_{\text{mass}}$  (B), and  $N/P$  (C) at different life forms (Tree and Shrub), \*\*\*\* represents  $p < 0.0001$ .
